# Supplementary material
Source: publisher site journal article supplement (https://www.dovepress.com/article/126651)
Supplement: Supplementary file 1 [file get_supplementary_file.php]

## Supplementary material

**Table S1. Search strategy**

| Database  | Dates                                 | Search terms                                                                                                                                                                                                                                                                                                                                                                                                                                                                                                                                                                                                                                                                                                                                                                                                                                                                                                                                                                                                                                                                                                                                                                                                                                                                                                                                                                                                                                                                               |
|-----------|---------------------------------------|--------------------------------------------------------------------------------------------------------------------------------------------------------------------------------------------------------------------------------------------------------------------------------------------------------------------------------------------------------------------------------------------------------------------------------------------------------------------------------------------------------------------------------------------------------------------------------------------------------------------------------------------------------------------------------------------------------------------------------------------------------------------------------------------------------------------------------------------------------------------------------------------------------------------------------------------------------------------------------------------------------------------------------------------------------------------------------------------------------------------------------------------------------------------------------------------------------------------------------------------------------------------------------------------------------------------------------------------------------------------------------------------------------------------------------------------------------------------------------------------|
| Medline   | 1946 –18 <sup>th</sup><br>April 2016  | <ol style="list-style-type: none"> <li>1. Medication Adherence/</li> <li>2. Patient Compliance/</li> <li>3. (adher* or complian*).mp. [mp=title, abstract, original title, name of substance word, subject heading word, keyword heading word, protocol supplementary concept word, rare disease supplementary concept word, unique identifier]</li> <li>4. (persist* or discontin*).mp. [mp=title, abstract, original title, name of substance word, subject heading word, keyword heading word, protocol supplementary concept word, rare disease supplementary concept word, unique identifier]</li> <li>5. 1 or 2 or 3 or 4</li> <li>6. Tamoxifen/</li> <li>7. tamoxifen.mp. [mp=title, abstract, original title, name of substance word, subject heading word, keyword heading word, protocol supplementary concept word, rare disease supplementary concept word, unique identifier]</li> <li>8. aromatase inhibitors/</li> <li>9. aromatase inhibitor*.mp. [mp=title, abstract, original title, name of substance word, subject heading word, keyword heading word, protocol supplementary concept word, rare disease supplementary concept word, unique identifier]</li> <li>10. Endocrine therapy.mp</li> <li>11. Hormon* therapy.mp</li> <li>12. 6 or 7 or 8 or 9 or 10 or 11</li> <li>13. Breast Neoplasms/</li> <li>14. Breast cancer*.mp</li> <li>15. breast neoplasm*.mp</li> <li>16. 13 or 14 or 15</li> <li>17. 5 and 12 and 16</li> <li>18. Limit 17 to female</li> </ol> |
| Psychinfo | 1806 –18 <sup>th</sup><br>April 2016  | <ol style="list-style-type: none"> <li>1. Exp Treatment compliance/</li> <li>2. (adher* or complian*).mp. [mp=title, abstract, heading word, table of contents, key concepts, original title, tests &amp; measures]</li> <li>3. Exp Treatment Termination/</li> <li>4. (persist* or discontin*).mp. [mp=title, abstract, heading word, table of contents, key concepts, original title, tests &amp; measures]</li> <li>5. 1 or 2 or 3 or 4</li> <li>6. Exp Hormone therapy/</li> <li>7. tamoxifen.mp. [mp=title, abstract, heading word, table of contents, key concepts, original title, tests &amp; measures]</li> <li>8. endocrine therapy.mp. [mp=title, abstract, heading word, table of contents, key concepts, original title, tests &amp; measures]</li> <li>9. aromatase inhibitor*.mp. [mp=title, abstract, heading word, table of contents, key concepts, original title, tests &amp; measures]</li> <li>10. hormon* therapy.mp. [mp=title, abstract, heading word, table of contents, key concepts, original title, tests &amp; measures]</li> <li>11. 6 or 7 or 8 or 9 or 10</li> <li>12. Exp breast neoplasm/</li> <li>13. (breast cancer* or breast neoplasm*).mp. [mp=title, abstract, heading word, table of contents, key concepts, original title, tests &amp; measures]</li> <li>14. 12 or 13</li> <li>15. 5 and 11 and 14</li> <li>16. Limit 15 to female</li> </ol>                                                                                                  |
| Embase    | 1974 - 18 <sup>th</sup><br>April 2016 | <ol style="list-style-type: none"> <li>1. Patient compliance/</li> <li>2. (persist* or discontin*).mp. [mp=title, abstract, subject headings, heading word, drug trade name, original title, device manufacturer, drug manufacturer, device trade name, keyword]</li> <li>3. (adher* or complian*).mp. [mp=title, abstract, subject headings,</li> </ol>                                                                                                                                                                                                                                                                                                                                                                                                                                                                                                                                                                                                                                                                                                                                                                                                                                                                                                                                                                                                                                                                                                                                   |

|                |                                      |                                                                                                                                                                                                        |
|----------------|--------------------------------------|--------------------------------------------------------------------------------------------------------------------------------------------------------------------------------------------------------|
|                |                                      | heading word, drug trade name, original title, device manufacturer, drug manufacturer, device trade name, keyword]                                                                                     |
|                |                                      | 4. 1 or 2 or 3                                                                                                                                                                                         |
|                |                                      | 5. Tamoxifen/ or tamoxifen.mp.                                                                                                                                                                         |
|                |                                      | 6. Aromatase inhibitor/                                                                                                                                                                                |
|                |                                      | 7. Hormonal therapy/                                                                                                                                                                                   |
|                |                                      | 8. aromatase inhibitor*.mp. [mp=title, abstract, subject headings, heading word, drug trade name, original title, device manufacturer, drug manufacturer, device trade name, keyword]                  |
|                |                                      | 9. hormon* therapy.mp. [mp=title, abstract, subject headings, heading word, drug trade name, original title, device manufacturer, drug manufacturer, device trade name, keyword]                       |
|                |                                      | 10. endocrine therapy.mp. [mp=title, abstract, subject headings, heading word, drug trade name, original title, device manufacturer, drug manufacturer, device trade name, keyword]                    |
|                |                                      | 11. 5 or 6 or 7 or 8 or 9 or 10                                                                                                                                                                        |
|                |                                      | 12. Breast cancer/                                                                                                                                                                                     |
|                |                                      | 13. (breast neoplasm* or breast cancer*).mp. [mp=title, abstract, subject headings, heading word, drug trade name, original title, device manufacturer, drug manufacturer, device trade name, keyword] |
|                |                                      | 14. 12 or 13                                                                                                                                                                                           |
|                |                                      | 15. 4 and 11 and 14                                                                                                                                                                                    |
|                |                                      | 16. Limit 16 to female                                                                                                                                                                                 |
| Web of Science | Up to 18 <sup>th</sup><br>April 2016 | 1. Adher* or complian*                                                                                                                                                                                 |
|                |                                      | 2. Persist* or discontin*                                                                                                                                                                              |
|                |                                      | 3. 1 or 2                                                                                                                                                                                              |
|                |                                      | 4. Tamoxifen                                                                                                                                                                                           |
|                |                                      | 5. Aromatase inhibitor*                                                                                                                                                                                |
|                |                                      | 6. Hormon* therapy                                                                                                                                                                                     |
|                |                                      | 7. Endocrine therapy                                                                                                                                                                                   |
|                |                                      | 8. 4 or 5 or 6 or 7                                                                                                                                                                                    |
|                |                                      | 9. breast cancer* or breast neoplasm*                                                                                                                                                                  |
|                |                                      | 10. 3 and 8 and 9                                                                                                                                                                                      |
| CINAHL         | Up to 18 <sup>th</sup><br>April 2016 | 1. (MH "Medication Compliance") OR (MH "Patient Compliance")                                                                                                                                           |
|                |                                      | 2. adher* or complian* or persist* or discontin*                                                                                                                                                       |
|                |                                      | 3. 1 or 2                                                                                                                                                                                              |
|                |                                      | 4. (MH "Tamoxifen") OR (MH "Aromatase Inhibitors") OR (MH "Hormone Therapy")                                                                                                                           |
|                |                                      | 5. Tamoxifen OR Aromatase inhibitor* OR Hormon* therapy OR Endocrine therapy                                                                                                                           |
|                |                                      | 6. 4 or 5                                                                                                                                                                                              |
|                |                                      | 7. (MH "Breast Neoplasms")                                                                                                                                                                             |
|                |                                      | 8. Breast cancer* or breast neoplasm*                                                                                                                                                                  |
|                |                                      | 9. 7 or 8                                                                                                                                                                                              |
|                |                                      | 10. 3 and 6 and 9                                                                                                                                                                                      |

---
